# Supplementary material for: Location of Tessellations in Ocular Fundus and Their Associations with Optic Disc Tilt, Optic Disc Area, and Axial Length in Young Healthy Eyes
Source: PLoS One. 2016 Jun 8;11(6):e0156842. doi: 10.1371/journal.pone.0156842 (PMC4898735; doi:10.1371/journal.pone.0156842)
Supplement: S1 Dataset — (XLSX) [file pone.0156842.s001.xlsx]

## Sheet: Tess
ID	Age	Sex	Final	Rater1	Rater2	Axial length	DplusC	Tilt	SE	Conus
1	29	M	2	2	6	25.82	2941.75	56.7356	-4	1
2	23	M	0	0	0	24.12	2223.98	21.4996	-0.5	0
3	25	M	0	0	0	24.1	1992.18	24.4648	-0.75	0
4	30	M	2	1	1	27.76	3747.05	30.292	-7.75	1
5	24	F	0	0	0	28.04	2498.24	19.9684	-10.25	1
6	23	F	1	1	1	26.93	3752.4	53.6487	-9	1
7	30	M	2	2	3	26.91	4048.66	64.3448	-9.25	1
8	29	M	1	1	1	24.54	2229.74	40.6614	-1.75	0
9	30	M	6	6	6	25.6	2031.02	24.4654	-3.25	0
10	23	M	0	1	1	24.32	2457.33	55.6021	-2.75	1
11	25	M	3	3	3	27.12	2109.44	41.236	-10	0
12	27	M	1	1	1	26.23	2821.64	46.9866	-7.5	1
13	23	F	1	1	1	25.24	2529.37	60.8365	-5.75	1
14	22	M	5	6	6	26.9	2997.06	43.7656	-5.75	1
15	22	F	1	6	6	24.96	2956.1	53.3313	-3.25	1
16	23	F	2	2	1	26.42	1916.27	44.4356	-6.75	0
17	28	M	3	3	3	26.13	3727.25	39.3855	-5.5	1
18	23	M	4	4	4	24.96	2576.29	18.7589	-0.5	0
19	23	M	1	1	2	26.13	4070.09	25.0083	-7	1
20	25	F	0	0	0	23.99	2639.11	31.1831	-3	1
21	24	F	0	0	0	27.06	2133.31	51.28	-7.5	1
22	26	M			6	26.48	2400.37	15.1962	-9.5	1
23	24	F	1	1	2	24.3	2652.04	34.9792	-4	1
24	36	F	0	0	0	22.3	1791.41	4.77461	4.5	0
25	32	F	0	0	0	22.89	2323.78	14.8355	0.5	0
26	24	M	5	4	4	25.01	2068.81	29.6404	-1.25	1
27	29	F	0	0	0	25.98	2675.31	30.2631	-4	1
28	28	M	3	3	0	26.8	2758.57	12.348	-6.25	0
29	23	F	0	0	0	22.38	2044.61	16.2366	0.5	0
30	24	F	2	2	2	26.5	3761.37	80.7655	-6.25	1
31	24	M	5	6	6	25.58	3212.64	21.175	-2.5	0
32	33	M	2	3	3	24.91	1631.27	41.8998	-5	0
33	25	M	0	0	4	25.97	2537.16	47.908	-6	1
34	38	M	6	6	6	25.34	2611.52	34.329	-6.5	1
35	25	F	0	0	0	24.17	1869.54	51.8746	-4.75	1
36	25	F	1	1	5	26.31	3341.82	62.3397	-8.5	1
37	26	M	2	2	5	25.55	2206.85	56.4322	-2.75	1
38	24	M	0	4	4	25.43	2595.56	42.5058	-1.25	1
39	24	M	0	0	0	24.97	2329.68	30.8402	-1.5	0
40	29	M	2	2	2	26.41	3071.33	69.241	-6.25	1
41	33	M	0	0	0	24.62	2255.86	13.0654	-1	0
42	22	M	2	1	5	25.76	2716.35	74.7518	-1.25	1
43	25	M	6	6	6	25.79	6257.73	60.2032	-6.25	1
44	26	M	0	0	0	24.45	3183.09	15.1461	0.25	0
45	25	M	2	2	3	26.16	2750.53	75.0379	-7.25	1
46	22	F	0	0	0	24.92	3318.14	73.3519	-5.75	1
47	22	M	3	4	4	27.08	2779.47	27.6584	-8	1
48	24	M	5	6	6	27.24	3762.13	8.79578	-6.25	1
49	28	F	4	4	4	26.11	3009.76	9.60038	-7.5	0
50	29	M	6	6	6	30.42	7331.39	15.503	-13	1
51	23	M	1	1	5	27.27	5063.26	38.0868	-3.5	1
52	23	M			5	24.17	2466.74	16.3646	-1.25	0
53	25	M	0	0	0	24.33	2260.46	41.193	-3.75	1
54	22	M	5	5	5	26.19	3533.98	6.69853	-5	0
55	27	M	6	6	6	26.25	3374.11	65.0415	-8.5	1
56	33	M	2	2	5	27.39	4131.6	38.5861	-6.5	1
57	35	F	3	3	4	25.91	2374.05	30.0751	-7.75	1
58	23	M	6	6	6	27.31	4309.43	60.2776	-8.5	1
59	25	M	0	0	0	24.61	2079.91	10.5003	-0.75	0
60	40	M	0	0	0	25.13	2772.3	14.321	-0.5	0
61	24	M	6	6	6	27.78	3287.8	45.5437	-10	1
62	24	M	0	0	0	22.87	1781.68	35.7727	-0.25	0
63	22	F	5	6	6	23.2	2680.67	47.7126	-2.75	1
64	23	M		6	6	27.33	2387.31	58.1738	-8.5	1
65	22	M		5	5	25.36	2373.16	65.7819	-4	1
66	24	M	4	4	4	24.2	1914.11	37.9552	-4.75	1
67	24	F	5	5	6	23.81	2669.33	32.1121	-0.25	0
68	24	M	2	3	3	24.82	2974.15	62.6962	-1.75	1
69	24	M	5		2	23.22	2832.03	23.3143	-0.5	0
70	22	M			3	24.69	2631.28	36.0281	-6.25	1
71	23	M	5	4	4	24.47	2238.44	13.0777	-0.75	0
72	22	F	0	0	0	24.62	1752.24	50.7473	-6.25	1
73	25	F	0	0	0	24.23	2515.91	46.4601	-5	1
74	26	F		3	3	26.91	4980.06	33.8894	-7.25	1
75	23	M	5	3	3	23.99	2699.07	33.3467	-0.75	0
76	23	M	0	1	1	27.37	3123	22.751	-6.5	1
77	23	F	2	3	3	25.75	3210.22	24.8822	-5.25	1
78	22	F	2	2	3	25.21	3181.61	40.77	-7.25	1
79	35	M	4	4	4	23.98	4247.91	20.5935	-0.5	1
80	30	M	3	3	3	24.22	2291.66	32.4534	-1.5	1
81	23	M	2	2	6	28.57	5569.59	31.8921	-10	1
82	24	M	0	0	0	24.57	2628.01	17.6902	0	0
83	23	F	2	2	2	24.6	2192.19	48.1377	-2.75	1
84	27	M	5	5	5	27.52	3014.8	31.8922	-7.5	1
85	31	M	0		3	23.94	1974.49	10.2567	-0.75	0
86	24	F	0	0	0	25.45	2028.15	39.7002	-6.25	1
87	24	M	6	6	6	25.57	3152.46	42.482	-4	1
88	28	M	0	4	4	24.75	2414.57	29.8208	-1.75	1
89	25	M	3	3	3	25.65	3461.18	14.9555	-5.25	1
90	24	M	0	4	4	24.38	2461.6	24.1793	-0.25	0
91	24	M	4	4	4	26.08	2241.85	25.016	-6.75	1
92	25	M	0	0	0	25.05	2633.26	59.1667	-4.25	1
93	31	M	0		5	27.28	2262.32	13.8416	-9.75	0
94	24	F	5	6	6	26.59	3417.09	54.8642	-12	1
95	24	M	5	6	6	25.68	3235.56	36.7015	-5.75	1
96	24	M	0	0	0	25.63	2495.49	53.3198	-7.25	1
97	23	M	6	6	6	27.38	2080.82	38.9833	-14.25	0
98	24	F	0	0	0	23.47	2453.23	44.8546	-4.5	1
99	26	M	3	3	3	28.16	2032.63	22.7124	-10.5	1
100	24	M	6	6	6	24.73	2437.53	19.8102	-1.5	0
101	28	M	2	2	3	28.57	4990.15	27.1468	-13	1
102	28	M	5	5	5	26.04	2536.38	49.4768	-6.75	1
103	30	M	1	1	3	27.39	4230.93	36.8683	-8.5	1
104	23	F	0	0	0	24.43	2428.03	24.3931	-0.75	0
105	38	M	2	2	5	26.11	3125.43	36.9454	-8	1
106	24	M	0	0	0	24.31	1806.42	31.6236	-2	0
107	24	F	1	1	2	24.93	3355.68	37.8351	-3.75	1
108	37	F	0	0	4	23.01	2459.05	32.1581	-0.5	0
109	23	F	0	0	0	23.45	2401.6	51.6058	-3.25	1
110	24	M	2	6	6	26.36	3144.72	34.5369	-6.5	1
111	23	M	0	0	0	23.61	2068.05	23.649	-0.25	0
112	25	F	4	4	4	26.65	2254.66	30.8214	-9	1
113	28	M	0	0	0	25.23	1957.58	28.7123	-7.5	1
114	26	F	4	4	4	22.96	2373	43.7236	-1	1
115	25	F	0	0	4	22.43	1478.72	39.1642	-2.5	0
116	28	M	4	4	4	24.87	1859.6	23.8917	-2.75	0
117	39	F	3	3	5	23.86	2811.62	31.5998	-4.25	1
118	35	F	0	0	0	24.4	1878.65	50.011	-4	1
119	25	F	2	2	2	25.35	2808.92	66.1081	-6.25	1
120	24	M	0	6	5	24.4	2700.69	46.225	-2.25	1
121	23	M	6	6	6	24.36	2451.97	21.3574	-1	0
122	25	M	0	0	0	25.77	2429.85	26.4831	-4.5	0
123	23	M	2	2	5	24.93	2678.78	73.1129	-3	1
124	25	F	0	0	0	24.79	1914.84	36.0308	-3.5	0
125	36	M	5	6	6	25.99	2799.88	19.5401	-3.5	1
126	23	F	1	2	2	24.93	1742.43	75.8366	-5.75	1
